# Supplementary material for: Chemical Characterization and Bioactivity of Commercial Essential Oils and Hydrolates Obtained from Portuguese Forest Logging and Thinning
Source: MDPI journal article supplement (doi:10.3390/molecules27113572), 2022-06-02
Supplement: s1 [file s1]

# Chemical Characterization and Bioactivity of Commercial Essential Oils and Hydrolates Obtained from Portuguese Forest Logging and Thinning

## Supplementary Material

### Essential oils composition

**Table S1.** Percentage composition of *Eucalyptus globulus* essential oils. For samples codes *vide* Table 10 in Materials and Methods section.

| Components                      | RI   | Eg_OE_1_G | Eg_OE_2_B | Eg_OE_3_O | Eg_OE_4_E | Eg_OE_5_P | Eg_OE_6_S |
|---------------------------------|------|-----------|-----------|-----------|-----------|-----------|-----------|
| Isovaleraldehyde                | 637  | 0.1       | 0.4       | t         | t         | t         | 0.1       |
| Isoamyl alcohol                 | 722  | t         | t         | t         | t         | t         | t         |
| Isovaleric acid                 | 847  | t         | t         | t         | t         | t         |           |
| Isoamyl acetate                 | 882  | t         | t         | t         | t         | t         | t         |
| $\alpha$ -Thujene               | 924  | t         | t         | t         | t         | t         | t         |
| $\alpha$ -Pinene                | 930  | 13.2      | 13.3      | 11.0      | 21.8      | 14.7      | 13.8      |
| $\alpha$ -Fenchene              | 938  | t         | 0.1       | t         | 0.1       | 0.1       | 0.1       |
| Camphene                        | 938  | t         | 0.1       | t         | 0.1       | 0.1       | 0.1       |
| Thuja-2,4(10)-diene*            | 940  | t         | t         | t         | t         | t         | t         |
| $\beta$ -Pinene                 | 963  | 0.4       | 0.3       | 0.4       | 0.7       | 0.4       | 0.3       |
| Dehydro 1,8-cineole             | 973  | t         | t         | t         | t         | t         | t         |
| $\beta$ -Myrcene                | 975  | 0.2       | t         | 1.0       | 0.7       | 0.1       | t         |
| $\alpha$ -Phellandrene          | 995  | 0.3       | 0.1       | 0.2       | 0.2       | 0.3       | 0.3       |
| $\alpha$ -Terpinene             | 1002 | t         |           | 0.1       | 0.1       | t         | t         |
| <i>p</i> -Cymene                | 1003 | 1.2       | 0.8       | 0.2       | 0.6       | 1.6       | 1.7       |
| 1,8-Cineole                     | 1005 | 65.2      | 63.2      | 59.5      | 53.9      | 58.2      | 49.4      |
| Limonene                        | 1009 | 8.2       | 17.2      | 13.7      | 16.6      | 12.5      | 18.0      |
| <i>cis</i> - $\beta$ -Ocimene   | 1017 | 0.3       | t         | 0.2       | 0.5       | 0.1       | t         |
| <i>trans</i> - $\beta$ -Ocimene | 1027 | t         | 0.1       | t         | 0.1       | t         |           |
| $\gamma$ -Terpinene             | 1035 | 0.5       | t         | 0.7       | 0.9       | 0.2       | 0.2       |
| 2,5-Dimethyl styrene            | 1059 | t         | t         | t         | t         | 0.2       | 0.2       |
| Terpinolene                     | 1064 | t         | t         | 0.2       | 0.1       | 0.1       | 0.1       |
| Nonanal                         | 1073 | t         | t         | t         | t         | t         | t         |
| Linalool                        | 1074 | t         |           | t         | t         | t         | t         |
| Isopentyl isovalerate           | 1080 | t         | t         | t         | t         | 0.1       | 0.1       |
| <i>endo</i> -Fenchol            | 1085 | t         | t         | t         | t         | 0.1       | 0.1       |
| $\alpha$ -Campholenal           | 1092 | 0.2       | 0.1       | t         | t         | 0.1       | 0.1       |
| Cosmene*                        | 1102 | t         | t         |           |           | t         | t         |
| <i>trans</i> -Pinocarveol       | 1106 | 1.6       | 1.9       | t         | 0.3       | 3.0       | 3.1       |
| Pinocarvone                     | 1121 | 1.3       | 1.2       | t         | 0.1       | 1.3       | 1.3       |
| $\delta$ -Terpineol             | 1134 | 0.1       | t         | 0.1       | 0.1       | 0.1       | 0.2       |
| Borneol                         | 1138 | 0.1       | t         | 0.1       | 0.1       | 0.1       | 0.2       |
| Terpinen-4-ol                   | 1148 | 0.3       | t         | 0.5       | 0.3       | 0.2       | 0.2       |
| $\alpha$ -Terpineol             | 1159 | 0.6       | 0.2       | 2.0       | 1.3       | 0.3       | 0.7       |
| Myrtenol                        | 1168 | t         | t         | t         | t         | 0.1       | 0.2       |
| <i>cis</i> -Piperitol*          | 1182 | t         | t         | t         | t         | t         | t         |

| Components                       | RI   | Eg_OE_1_G | Eg_OE_2_B | Eg_OE_3_O | Eg_OE_4_E | Eg_OE_5_P | Eg_OE_6_S |
|----------------------------------|------|-----------|-----------|-----------|-----------|-----------|-----------|
| <i>cis</i> -carveol              | 1202 | 0.1       | t         | t         | t         | 0.1       | 0.1       |
| Carvone                          | 1210 | t         | t         |           | t         | t         | 0.1       |
| Geraniol                         | 1236 | 0.2       |           | 0.5       | t         | t         | t         |
| $\alpha$ -Terpenyl acetate       | 1334 | 2.2       | t         | 5.4       | 0.2       | 0.8       | 0.9       |
| Geranyl acetate                  | 1370 | t         |           | 0.2       | t         | t         | t         |
| $\beta$ -Caryophyllene           | 1414 | 0.6       | t         | t         | t         | 0.2       | 0.2       |
| Aromadendrene                    | 1428 | 1.2       | 0.4       | 0.4       | 0.4       | 3.1       | 4.3       |
| $\alpha$ -Humulene               | 1447 | 0.3       | t         | t         | t         | t         | 0.1       |
| <i>allo</i> -Aromadendrene       | 1456 | 0.3       | t         | 0.2       | 0.1       | 0.6       | 0.8       |
| Phenethyl isovalerate            | 1468 | t         | t         | 0.1       | t         | t         | t         |
| Germacrene-D                     | 1474 | t         |           | t         |           | t         | 0.1       |
| Viridiflorene                    | 1487 | t         | t         | 0.2       | t         | 0.2       | 0.3       |
| Globulol                         | 1566 | 0.3       | 0.2       | 0.7       | 0.2       | 0.5       | 1.0       |
| % Identification                 |      | 99.0      | 99.6      | 97.6      | 99.5      | 99.5      | 99.4      |
| <b>Grouped components:</b>       |      |           |           |           |           |           |           |
| Monoterpene hydrocarbons         |      | 24.3      | 32.0      | 27.7      | 42.5      | 30.2      | 34.6      |
| Oxygen-containing monoterpenes   |      | 71.9      | 66.6      | 68.3      | 56.3      | 64.4      | 56.6      |
| Sesquiterpene hydrocarbons       |      | 2.4       | 0.4       | 0.8       | 0.5       | 4.1       | 5.8       |
| Oxygen-containing sesquiterpenes |      | 0.3       | 0.2       | 0.7       | 0.2       | 0.5       | 1.0       |
| Others.                          |      | 0.1       | 0.4       | 0.1       | t         | 0.3       | 0.4       |

RI: In-lab calculated retention index relative to C<sub>9</sub>-C<sub>16</sub> *n*-alkanes on the DB-1 column. t: traces (< 0.05%). \* Identification based on mass spectra only.

**Table S2.** Percentage composition of *Pinus pinaster* essential oils. For samples codes *vide* Table 10 in Materials and Methods section.

| Components                      | RI   | Pp_OE_1_G | Pp_OE_2_P | Pp_OE_3_S |
|---------------------------------|------|-----------|-----------|-----------|
| Hexenal                         | 866  |           |           | t         |
| <i>cis</i> -3-Hexen-1-ol        | 868  |           | t         | t         |
| Tricyclene                      | 921  | t         | t         | t         |
| $\alpha$ -Thujene               | 924  | t         | t         | t         |
| $\alpha$ -Pinene                | 930  | 28.0      | 44.6      | 36.5      |
| $\alpha$ -Fenchene              | 938  | 0.2       | 0.4       | 0.4       |
| Camphene                        | 938  | 0.2       | 0.4       | 0.4       |
| Thuja-2,4(10)-diene*            | 940  | 0.1       | 0.1       | 0.3       |
| Sabinene                        | 958  | t         | t         | t         |
| $\beta$ -Pinene                 | 963  | 28.5      | 23.0      | 18.8      |
| 2-Pentyl furan                  | 973  | t         | t         | t         |
| $\beta$ -Myrcene                | 975  | 11.0      | 5.0       | 5.9       |
| $\alpha$ -Phellandrene          | 995  | 0.1       | t         | 0.2       |
| $\delta$ -3-Carene              | 1000 | 6.6       | 2.1       | 1.8       |
| $\alpha$ -Terpinene             | 1002 | 0.1       | t         | 0.1       |
| <i>p</i> -Cymene                | 1003 | 0.1       | 0.2       | 0.2       |
| $\beta$ -Phellandrene           | 1005 | 1.1       | 0.8       | 1.2       |
| 1,8-Cineole                     | 1005 |           | 0.8       | 0.6       |
| Limonene                        | 1009 | 4.5       | 3.9       | 3.3       |
| <i>cis</i> - $\beta$ -Ocimene   | 1017 | t         | t         | t         |
| <i>trans</i> - $\beta$ -Ocimene | 1027 | 0.6       | 0.2       | 0.5       |
| $\gamma$ -Terpinene             | 1035 | 0.1       | t         | t         |
| 2,5-Dimethyl styrene            | 1059 | t         | 0.1       | 0.1       |
| Terpinolene                     | 1064 | 1.1       | 0.3       | 0.7       |

| Components                          | RI   | Pp_OE_1_G | Pp_OE_2_P | Pp_OE_3_S |
|-------------------------------------|------|-----------|-----------|-----------|
| Nonanal                             | 1073 | t         | 0.3       | 0.1       |
| Linalool                            | 1074 | t         | 0.1       | 0.1       |
| Isopenthyl isovalerate              | 1080 | t         | t         | t         |
| <i>endo</i> -Fenchol                | 1085 | 0.1       | 0.1       | 0.1       |
| <i>trans</i> -Pinocarveol           | 1106 | t         | 0.4       | 0.1       |
| <i>cis</i> -Verbenol                | 1113 | t         | 0.1       | t         |
| <i>trans</i> -Pinocamphone          | 1121 | t         | 0.1       | 0.1       |
| Borneol                             | 1138 | t         | 0.1       | 0.2       |
| Terpinen-4-ol                       | 1148 | t         | t         | 0.1       |
| <i>p</i> -Cymen-8-ol                | 1148 |           | t         | t         |
| Myrtenal                            | 1153 | t         | 0.1       | 0.1       |
| $\alpha$ -Terpineol                 | 1159 | 0.3       | 0.5       | 0.6       |
| Myrtenol                            | 1168 |           | 0.2       | 0.1       |
| Methyl thymol                       | 1210 | 0.1       | t         | 0.1       |
| Hexyl isovalerate                   | 1225 | t         | 0.1       | 0.1       |
| Linalyl acetate                     | 1245 | 0.1       | 0.1       | 0.1       |
| Bornyl acetate                      | 1265 | 0.1       | 0.1       | 0.1       |
| Thymol                              | 1275 | t         |           | t         |
| <i>trans</i> -Pinocarvyl acetate    | 1278 | t         | t         | t         |
| Tridecane                           | 1300 | t         | t         | t         |
| $\alpha$ -Cubebene                  | 1345 | 0.2       | 0.4       | 0.4       |
| Geranyl acetate                     | 1370 | 0.1       | 0.1       | 0.1       |
| $\alpha$ -Ylangene                  | 1371 | 0.1       | 0.1       | 0.1       |
| $\alpha$ -Copaene                   | 1375 | 0.3       | 0.4       | 0.6       |
| $\beta$ -Bourbonene                 | 1379 | t         | 0.2       | t         |
| Longifolene                         | 1399 | 0.4       | 0.9       | 1.4       |
| $\beta$ -Caryophyllene              | 1414 | 4.5       | 5.0       | 8.7       |
| $\beta$ -Copaene                    | 1426 | 0.1       | 0.2       | 0.3       |
| Aromandendrene                      | 1428 |           | 0.1       |           |
| $\alpha$ -Humulene                  | 1447 | 0.6       | 0.7       | 1.2       |
| Phenethyl 2-methyl butyrate         | 1467 | 0.1       | 0.1       | 0.1       |
| Phenethyl isovalerate               | 1468 | 0.3       | 0.1       | 0.4       |
| $\gamma$ -Muurolene                 | 1469 | 0.7       | 1.0       | 1.4       |
| Germacrene-D                        | 1474 | 6.3       | 1.7       | 5.6       |
| $\alpha$ -Muurolene                 | 1494 | 0.2       | 0.3       | 0.5       |
| $\gamma$ -Cadinene                  | 1500 | 0.4       | 0.4       | 0.4       |
| <i>trans</i> -Calamenene            | 1505 | t         | 0.2       | 0.1       |
| $\delta$ -Cadinene                  | 1505 | 1.1       | 1.0       | 2.1       |
| $\alpha$ -Cadinene                  | 1529 | t         | t         | 0.1       |
| <i>trans</i> - $\alpha$ -Bisabolene | 1536 | 0.1       | 0.1       | 0.1       |
| $\beta$ -Caryophyllene oxide        | 1561 | 0.1       | 0.7       | 0.2       |
| Abietatriene                        | 2045 | t         | 0.2       | t         |
| Abietadiene                         | 2060 | 0.4       | 0.2       | 0.5       |
| Abieta-8(14),13(15)-diene*          | 2116 | 0.1       | t         | 0.1       |
| <b>% Identification</b>             |      | 99.1      | 98.4      | 97.7      |
| <b>Grouped components</b>           |      |           |           |           |
| Monoterpene hydrocarbons            |      | 82.3      | 81.0      | 70.3      |
| Oxygen-containing monoterpenes      |      | 0.8       | 2.9       | 2.8       |
| Sesquiterpene hydrocarbons          |      | 15.0      | 12.7      | 23.0      |
| Oxygen-containing sesquiterpenes    |      | 0.1       | 0.7       | 0.2       |
| Diterpene hydrocarbons              |      | 0.5       | 0.4       | 0.6       |
| Others.                             |      | 0.4       | 0.7       | 0.8       |

RI: In-lab calculated retention index relative to C<sub>9</sub>-C<sub>22</sub> *n*-alkanes on the DB-1 column. t: traces (< 0.05%). \* Identification based on mass spectra only.

**Table S3.** Percentage composition of *Pinus pinea* essential oil. For samples codes *vide* Table 10 in Materials and Methods section.

| Components                        | RI   | Ppi_OE_1_B |
|-----------------------------------|------|------------|
| 2- <i>trans</i> -Hexenal          | 866  | t          |
| <i>cis</i> -3-Hexen-1-ol          | 868  | 0.2        |
| <i>n</i> -Hexanol                 | 881  | t          |
| Tricyclene                        | 921  | t          |
| $\alpha$ -Thujene                 | 924  | t          |
| $\alpha$ -Pinene                  | 930  | 7.6        |
| Camphene                          | 938  | 0.1        |
| Thuja-2,4(10)-diene*              | 940  | t          |
| Sabinene                          | 958  | t          |
| $\beta$ -Pinene                   | 963  | 1.2        |
| $\beta$ -Myrcene                  | 975  | 2.1        |
| $\alpha$ -Phellandrene            | 995  | 0.1        |
| <i>p</i> -Cymene                  | 1003 | 0.3        |
| 1,8-Cineole                       | 1005 | 3.8        |
| $\beta$ -Phellandrene             | 1005 | 3.8        |
| Limonene                          | 1009 | 72.8       |
| <i>cis</i> - $\beta$ -Ocimene     | 1017 | 0.1        |
| <i>trans</i> - $\beta$ -Ocimene   | 1027 | t          |
| $\gamma$ -Terpinene               | 1035 | t          |
| 2,5-Dimethyl styrene              | 1059 | t          |
| Terpinolene                       | 1064 | 0.1        |
| <i>n</i> -Nonanal                 | 1073 | t          |
| Linalool                          | 1074 | t          |
| <i>endo</i> -Fenchol              | 1085 | t          |
| <i>cis</i> -Limonene oxide        | 1095 | 0.2        |
| <i>trans</i> -Limonene oxide      | 1112 | 0.1        |
| Cryptone*                         | 1143 | 0.3        |
| Terpinen-4-ol                     | 1148 | 0.1        |
| $\alpha$ -Terpineol               | 1159 | 0.3        |
| <i>trans</i> -Carveol             | 1189 | 0.2        |
| <i>cis</i> -Carveol               | 1202 | 0.1        |
| Carvone                           | 1210 | 0.2        |
| Methyl thymol                     | 1210 | 0.6        |
| Bornyl acetate                    | 1265 | 0.1        |
| $\alpha$ -Terpenyl acetate        | 1334 | 0.6        |
| $\alpha$ -Longipinene             | 1338 | 0.5        |
| Longifolene                       | 1399 | 1.0        |
| $\beta$ -Caryophyllene            | 1414 | 1.0        |
| $\beta$ -Copaene                  | 1426 | t          |
| Aromadendrene                     | 1428 | 0.6        |
| $\alpha$ -Humulene                | 1447 | 0.2        |
| <i>trans</i> - $\beta$ -Farnesene | 1455 | 0.1        |
| <i>allo</i> -Aromadendrene        | 1456 | 0.1        |
| Phenethyl 2-methyl butyrate       | 1467 | 0.1        |
| $\gamma$ -Muurolene               | 1469 | t          |

| Components                       | RI   | Ppi_OE_1_B |
|----------------------------------|------|------------|
| Germacrene-D                     | 1474 | t          |
| Viridiflorene                    | 1487 | 0.1        |
| $\beta$ -Caryophyllene oxide     | 1561 | 0.3        |
| Globulol                         | 1566 | 0.2        |
| Viridiflorol                     | 1569 | t          |
| % Identification                 |      | 99.2       |
| <b>Grouped components</b>        |      |            |
| Monoterpene hydrocarbons         |      | 88.2       |
| Oxygen-containing monoterpenes   |      | 6.6        |
| Sesquiterpene hydrocarbons       |      | 3.6        |
| Oxygen-containing sesquiterpenes |      | 0.5        |
| Others.                          |      | 0.3        |

RI: In-lab calculated retention index relative to C<sub>8</sub>-C<sub>16</sub> *n*-alkanes on the DB-1 column. t: traces (< 0.05%). \* Identification based on mass spectra only.

**Table S4.** Percentage composition of *Cryptomeria japonica* essential oil. For samples codes *vide* Table 10 in Materials and Methods section.

| Components                              | RI   | Cj_OE_1_M |
|-----------------------------------------|------|-----------|
| Tricyclene                              | 921  | 0.3       |
| $\alpha$ -Thujene                       | 924  | 1.3       |
| $\alpha$ -Pinene                        | 930  | 26.1      |
| $\alpha$ -Fenchene                      | 938  | 0.6       |
| Camphene                                | 938  | 1.8       |
| Sabinene                                | 958  | 18.1      |
| $\beta$ -Pinene                         | 963  | 2.0       |
| $\beta$ -Myrcene                        | 975  | 4.4       |
| $\alpha$ -Phellandrene                  | 995  | 0.1       |
| $\delta$ -3-Carene                      | 1000 | 1.2       |
| $\alpha$ -Terpinene                     | 1002 | 1.6       |
| <i>p</i> -Cymene                        | 1003 | 0.4       |
| $\beta$ -Phellandrene                   | 1005 | 0.7       |
| Limonene                                | 1009 | 3.8       |
| <i>cis</i> - $\beta$ -Ocymene           | 1017 | t         |
| <i>trans</i> - $\beta$ -Ocymene         | 1027 | t         |
| $\gamma$ -Terpinene                     | 1035 | 2.6       |
| <i>trans</i> -Sabinene hydrate          | 1037 | 0.2       |
| 2,5-Dimethyl styrene                    | 1059 | t         |
| Terpinolene                             | 1064 | 1.0       |
| <i>cis</i> -Sabinene hydrate            | 1066 | 0.1       |
| Linalool                                | 1074 | 0.2       |
| <i>trans</i> -Thujone                   | 1081 | t         |
| 1-Octen-3-yl-acetate                    | 1086 | t         |
| $\alpha$ -Campholenal                   | 1092 | 0.1       |
| <i>trans</i> - <i>p</i> -2-Menthen-1-ol | 1099 | 0.1       |
| Camphor                                 | 1102 | t         |
| <i>cis</i> - <i>p</i> -2-Menthen-1-ol   | 1114 | 0.1       |
| <i>trans</i> -Pinocamphone              | 1121 | t         |
| Borneol                                 | 1138 | t         |
| <i>cis</i> -Pinocamphone                | 1134 | t         |
| Terpinen-4-ol                           | 1148 | 2.3       |

| Components                          | RI   | Cj_OE_1_M |
|-------------------------------------|------|-----------|
| $\alpha$ -Terpineol                 | 1159 | 0.1       |
| <i>cis</i> -Piperitol*              | 1182 | t         |
| <i>trans</i> -Piperitol             | 1189 | t         |
| $\alpha$ -Fenchyl acetate           | 1200 | t         |
| Piperitone                          | 1211 | t         |
| Geraniol                            | 1236 | t         |
| Linalyl acetate                     | 1245 | 0.2       |
| <i>trans</i> -Anethole              | 1254 | t         |
| Bornyl acetate                      | 1265 | 1.8       |
| <i>cis</i> -Verbenyl acetate        | 1266 | 0.1       |
| $\alpha$ -Terpenyl acetate          | 1334 | 0.2       |
| $\alpha$ -Cubebene                  | 1345 | t         |
| Geranyl acetate                     | 1370 | t         |
| $\alpha$ -Copaene                   | 1375 | t         |
| $\beta$ -Bourbonene                 | 1379 | t         |
| $\beta$ -Elemene                    | 1388 | 0.1       |
| $\beta$ -Caryophyllene              | 1414 | t         |
| $\beta$ -Copaene                    | 1426 | 0.1       |
| $\alpha$ -Humulene                  | 1447 | t         |
| <i>trans</i> - $\beta$ -Farnesene   | 1455 | t         |
| $\gamma$ -Muurolene                 | 1469 | 0.1       |
| Germacrene-D                        | 1474 | 0.3       |
| $\alpha$ -Muurolene                 | 1494 | 0.1       |
| $\beta$ -Bisabolene                 | 1500 | 0.2       |
| $\gamma$ -Cadinene                  | 1500 | 0.2       |
| $\delta$ -Cadinene                  | 1505 | 0.5       |
| $\alpha$ -Cadinene                  | 1529 | t         |
| Elemol                              | 1530 | 4.4       |
| <i>trans</i> -Nerolidol             | 1549 | t         |
| Germacrene-D-4-ol*                  | 1557 | 0.2       |
| Cedrol                              | 1574 | t         |
| Anydrooplopanone                    | 1576 | 0.1       |
| 10- <i>epi</i> - $\gamma$ -Eudesmol | 1593 | 0.1       |
| $\gamma$ -Eudesmol                  | 1609 | 0.6       |
| <i>trans</i> -Muurolol              | 1616 | 0.1       |
| $\alpha$ -Muurolol                  | 1618 | 0.1       |
| $\beta$ -Eudesmol                   | 1620 | 0.9       |
| $\alpha$ -Eudesmol                  | 1634 | 1.1       |
| Cryptomerione*                      | 1686 | t         |
| Oplopanoyl acetate*                 | 1808 | t         |
| Rimuene                             | 1814 | t         |
| Isopimara-9(11),15-diene            | 1821 | 0.5       |
| Isokaurene*                         | 1977 | 0.5       |
| Sandaracopimara-8(14),15-diene      | 1956 | 0.7       |
| Phyllocladene                       | 2006 | 13.8      |
| Kaurene                             | 2044 | 0.5       |
| Nezukol*                            | 2112 | 0.7       |
| <b>% Identification</b>             |      | 97.4      |
| <b>Grouped components</b>           |      |           |
| Monoterpene hydrocarbons            |      | 66.0      |
| Oxygen-containing monoterpenes      |      | 5.5       |
| Sesquiterpene hydrocarbons          |      | 1.6       |

| Components                       | RI | Cj_OE_1_M |
|----------------------------------|----|-----------|
| Oxygen-containing sesquiterpenes |    | 7.6       |
| Diterpene hydrocarbons           |    | 16.0      |
| Oxygen-containing diterpenes     |    | 0.7       |
| Phenylpropanoids                 |    | t         |
| Others.                          |    | t         |

RI: In-lab calculated retention index relative to C<sub>9</sub>-C<sub>22</sub> *n*-alkanes on the DB-1 column. t: traces (< 0.05%). \* Identification based on mass spectra only.

#### *Hydrolates volatiles composition*

**Table S5.** Percentage composition of *Eucalyptus globulus* hydrolates volatiles. For samples codes *vide* Table 10 in Materials and Methods section.

| Components                              | RI   | Eg_Hd_1_G | Eg_Hd_2_O | Eg_Hd_3_E | Eg_Hd_4_P |
|-----------------------------------------|------|-----------|-----------|-----------|-----------|
| 2- <i>trans</i> -Hexenal                | 866  | t         | t         | t         | t         |
| Isovaleric acid                         | 867  | t         | t         | t         | t         |
| <i>cis</i> -3-Hexen-1-ol                | 868  | t         | t         | t         | t         |
| 2-Methyl butyric acid                   | 871  | t         |           | t         | t         |
| <i>cis</i> -2-Hexen-1-ol                | 882  | t         | t         | t         | t         |
| <i>n</i> -Hexanol                       | 883  | t         | t         | t         | t         |
| 2-Acetyl furan*                         | 897  |           |           |           | t         |
| Terbutyl isovalerate                    | 924  | t         |           | t         | t         |
| Benzaldehyde                            | 927  |           | t         |           |           |
| $\alpha$ -Pinene                        | 930  | t         |           | t         | t         |
| Hexanoic acid                           | 968  | t         | t         | t         | t         |
| Benzyl alcohol                          | 1002 |           | t         | t         | t         |
| Benzene acetaldehyde                    | 1004 |           | t         | t         | t         |
| 2-Ethyl-1-hexanol                       | 1004 |           |           |           | 2.3       |
| 1,8-Cineole                             | 1005 | 80.2      | 55.5      | 53.5      | 4.5       |
| Limonene                                | 1009 | 7.3       | 14.1      | 6.7       | 1.5       |
| Acetophenone                            | 1017 | t         | t         | t         |           |
| <i>cis</i> -Linalool oxide (furanoid)   | 1045 | t         | 0.1       | t         | t         |
| <i>trans</i> -Linalool oxide (furanoid) | 1059 | t         | 0.1       | t         | t         |
| Phenyl ethyl alcohol                    | 1067 | t         | 0.1       |           | t         |
| Linalool                                | 1074 | t         | 0.5       | t         | t         |
| <i>endo</i> -Fenchol                    | 1085 | t         | t         | t         | t         |
| $\alpha$ -Campholenal                   | 1092 | t         | t         | t         | 0.4       |
| Nopinone                                | 1093 | t         | t         |           | t         |
| <i>trans</i> - <i>p</i> -2-Menthen-1-ol | 1099 | t         | t         | t         | t         |
| Cosmene*                                | 1102 | t         |           | t         | t         |
| <i>trans</i> -Pinocarveol               | 1106 | 4.9       | 0.4       | 8.0       | 36.6      |
| <i>cis</i> -Verbenol                    | 1114 | t         | 0.1       | t         |           |
| <i>cis</i> - <i>p</i> -2-Menthen-1-ol   | 1114 | t         | t         | t         | 4.6       |
| Pinocarvone                             | 1121 | 1.6       | 0.1       | t         | 0.3       |
| Benzyl acetate                          | 1123 |           | t         |           |           |
| $\delta$ -Terpineol                     | 1134 | t         | 1.2       |           |           |
| Borneol                                 | 1138 | t         | 1.2       |           | 3.7       |
| <i>p</i> -Cymen-8-ol                    | 1148 | 0.9       | t         | t         | 2.4       |
| Terpinen-4-ol                           | 1148 | t         | 3.0       | 2.2       |           |
| Myrtenal                                | 1153 |           | t         | t         | 5.5       |
| $\alpha$ -Terpineol                     | 1159 | 2.7       | 17.2      | 24.7      | 5.3       |
| Verbenone                               | 1164 | t         | t         | t         |           |

| Components                              | RI   | Eg_Hd_1_G | Eg_Hd_2_O | Eg_Hd_3_E | Eg_Hd_4_P |
|-----------------------------------------|------|-----------|-----------|-----------|-----------|
| Myrtenol                                | 1168 |           | t         | t         | 12.0      |
| <i>trans</i> -Carveol                   | 1189 | t         | 0.1       | t         | 2.4       |
| <i>cis</i> -Carveol                     | 1202 | 1.1       | 0.1       | 2.8       | 8.6       |
| 2-Hydroxy-3-pinanone                    | 1206 |           |           |           | t         |
| Carvone                                 | 1210 | t         |           | t         | t         |
| Neral                                   | 1210 | t         | t         | t         |           |
| Citronellol                             | 1211 | t         | 0.5       |           |           |
| <i>cis</i> -Piperitone epoxide          | 1211 | t         | 0.4       | t         | 0.9       |
| 2-Phenyl ethyl acetate                  | 1228 | t         | t         | t         |           |
| Geraniol                                | 1236 | t         | 2.6       | t         | t         |
| <i>m</i> -Acetanisole                   | 1237 | t         | 0.5       | t         |           |
| Geranial                                | 1240 | t         | 0.2       | t         | t         |
| Linalyl acetate                         | 1254 |           | t         | t         | t         |
| Thymol                                  | 1275 | t         | t         | t         | 1.5       |
| 2-Methoxy-4-vinylphenol                 | 1285 | t         | t         | t         | t         |
| Carvacrol                               | 1286 | t         | t         | t         | t         |
| <i>p</i> -Acetanisole *                 | 1311 | t         | t         | t         |           |
| <i>Exo</i> -2-hydroxy cineole acetate * | 1323 | t         | 0.8       |           | 2.4       |
| $\alpha$ -Terpenyl acetate              | 1334 |           | t         | t         |           |
| Geranyl acetate                         | 1370 | t         | t         | t         |           |
| Perilla alcohol isopentyl ether         | 1389 |           | t         | t         | t         |
| Spathulenol                             | 1551 | t         | t         | t         |           |
| Viridiflorol                            | 1569 | t         | t         | t         |           |
| Globulol                                | 1566 | t         | t         | t         | t         |
| Ledol                                   | 1580 |           | 0.2       | t         |           |
| $\gamma$ -Eudesmol                      | 1609 | t         | 0.1       | t         |           |
| $\beta$ -Eudesmol                       | 1620 | t         | 0.2       |           |           |
| $\alpha$ -Eudesmol                      | 1634 | t         | 0.1       |           |           |
| <b>% Identification</b>                 |      | 98.8      | 99.2      | 97.8      | 94.7      |
| <b>Grouped components:</b>              |      |           |           |           |           |
| Monoterpene hydrocarbons                |      | 7.3       | 14.3      | 6.7       | 1.5       |
| Oxygen-containing monoterpenes          |      | 91.5      | 83.8      | 91.1      | 91.0      |
| Oxygen-containing sesquiterpenes        |      | 0.0       | 0.5       | t         | t         |
| Others.                                 |      | t         | 0.6       | t         | 2.3       |

RI: In-lab calculated retention index relative to C<sub>8</sub>-C<sub>17</sub> *n*-alkanes on the DB-1 column. t: traces (< 0.05%). \* Identification based on mass spectra only.

**Table S6.** Percentage composition of *Pinus pinaster* hydrolates volatiles. For samples codes *vide* Table 10 in Materials and Methods section.

| Components               | RI   | Pp_Hd_1_G | Pp_Hd_2_P |
|--------------------------|------|-----------|-----------|
| 2- <i>trans</i> -Hexenal | 866  | t         | t         |
| <i>cis</i> -3-Hexen-1-ol | 868  | t         | t         |
| <i>cis</i> -2-Hexen-1-ol | 882  | t         | t         |
| <i>n</i> -Hexanol        | 883  | t         | t         |
| Benzaldehyde             | 927  | t         | t         |
| $\alpha$ -Pinene         | 930  | t         | t         |
| $\beta$ -Pinene          | 963  | t         | t         |
| Benzyl alcohol           | 1002 | t         | t         |
| Benzene acetaldehyde     | 1004 | t         | t         |
| 2-Ethyl-1-hexanol        | 1004 |           | t         |



| Components                              | RI   | Pp_Hd_1_G | Pp_Hd_2_P |
|-----------------------------------------|------|-----------|-----------|
| 1,8-Cineole                             | 1005 | 5.0       | t         |
| Limonene                                | 1009 | 4.3       |           |
| <i>cis</i> -Linalool oxide (furanoid)   | 1045 |           | t         |
| <i>trans</i> -Linalool oxide (furanoid) | 1059 |           | t         |
| Phenyl ethyl alcohol                    | 1067 |           | t         |
| Linalool                                | 1074 | t         | t         |
| <i>endo</i> -Fenchol                    | 1085 | t         | t         |
| <i>trans-p</i> -2-Menthen-1-ol          | 1099 | t         | t         |
| Camphor                                 | 1102 | t         | t         |
| <i>trans</i> -Pinocarveol               | 1106 | t         | t         |
| <i>cis</i> -Verbenol                    | 1114 | t         | t         |
| <i>cis-p</i> -2-Menthen-1-ol            | 1114 | t         | 14.0      |
| <i>neo</i> -Isopulegol                  | 1116 |           | 14.0      |
| <i>trans</i> -Pinocamphone              | 1121 | t         | t         |
| Pinocarvone                             | 1121 | t         | t         |
| Isoborneol                              | 1132 | t         | t         |
| <i>cis</i> -Linalool oxide (pyranoid)   | 1132 |           | t         |
| Borneol                                 | 1138 | t         | t         |
| Terpinen-4-ol                           | 1148 | 7.5       |           |
| <i>p</i> -Cymen-8-ol                    | 1148 | 7.5       | t         |
| Myrtenal                                | 1153 | t         |           |
| $\alpha$ -Terpineol                     | 1159 | 43.8      | 38.1      |
| Verbenone                               | 1164 | 17.9      | 28.7      |
| <i>trans</i> -Carveol                   | 1189 | t         | t         |
| Geraniol                                | 1236 | t         | t         |
| Perilla alcohol                         | 1274 | 6.6       | t         |
| Thymol                                  | 1275 | 6.6       | t         |
| Carvacrol                               | 1286 | t         | t         |
| Geranyl acetate                         | 1370 | t         | t         |
| Methyl eugenol                          | 1377 | t         | t         |
| Phenethyl 2-methybutyrate               | 1467 | t         | t         |
| Phenethyl isovalerate                   | 1468 |           | t         |
| Globulol                                | 1566 | t         | t         |
| epi- $\alpha$ -Muurolol                 | 1616 | t         | t         |
| $\alpha$ -Cadinol                       | 1616 | t         | t         |
| <b>% Identification</b>                 |      | 99.1      | 94.7      |
| <b>Grouped components</b>               |      |           |           |
| Monoterpene hydrocarbons                |      | 4.3       | t         |
| Oxygen-containing monoterpenes          |      | 94.8      | 94.7      |
| Oxygen-containing sesquiterpenes        |      | 0.0       | t         |
| Phenylpropanoids                        |      | t         | t         |
| Others.                                 |      | t         | t         |

RI: In-lab calculated retention index relative to C<sub>8</sub>-C<sub>17</sub> *n*-alkanes on the DB-1 column. t: traces (< 0.05%). \* Identification based on mass spectra only.

**Table S7.** Percentage composition of *Cryptomeria japonica* hydrolates volatiles. For samples codes *vide* Table 10 in Materials and Methods section.

| Components               | RI  | Cj_Hd_1_M |
|--------------------------|-----|-----------|
| <i>cis</i> -3-Hexen-1-ol | 868 | t         |
| <i>n</i> -Hexanol        | 883 | t         |

| Components                              | RI   | Cj_Hd_1_M |
|-----------------------------------------|------|-----------|
| <i>n</i> -Nonane                        | 900  | t         |
| $\alpha$ -Pinene                        | 930  | t         |
| <i>n</i> -Heptanol                      | 952  | t         |
| 1-Octen-3-ol                            | 961  | t         |
| $\beta$ -Pinene                         | 963  | t         |
| $\beta$ -Myrcene                        | 975  | t         |
| $\alpha$ -Phellandrene                  | 995  | t         |
| Benzene acetaldehyde                    | 1002 | t         |
| $\alpha$ -Terpinene                     | 1002 | t         |
| <i>p</i> -Cymene                        | 1003 | t         |
| 1,8-Cineole                             | 1005 | 6.3       |
| Limonene                                | 1009 | 2.3       |
| Acetophenone                            | 1017 | t         |
| $\gamma$ -Terpinene                     | 1035 | t         |
| <i>cis</i> -Linalool oxide (furanoid)   | 1045 | t         |
| Fenchone                                | 1050 | t         |
| <i>trans</i> -Linalool oxide (furanoid) | 1059 | t         |
| Linalool                                | 1074 | 2.6       |
| <i>trans-p</i> -2-Menthen-1-ol          | 1099 | 2.8       |
| Camphor                                 | 1102 | 0.4       |
| <i>cis-p</i> -2-Menthen-1-ol            | 1114 | 2.5       |
| Pinocarvone                             | 1121 | 0.7       |
| <i>cis</i> -Pinocamphone                | 1134 | 0.3       |
| Borneol ethyl ether                     | 1138 | 0.7       |
| Terpinen-4-ol                           | 1148 | 56.2      |
| $\alpha$ -Terpineol                     | 1159 | 4.6       |
| Citronellol                             | 1211 | 0.2       |
| Linalyl acetate                         | 1245 | 0.5       |
| Bornyl acetate                          | 1265 | 0.8       |
| <i>trans</i> -Pinocarvyl acetate        | 1278 | t         |
| Carvacrol                               | 1286 | 0.1       |
| <i>trans</i> -Carvyl acetate            | 1305 | t         |
| $\alpha$ -Terpenyl acetate              | 1334 | t         |
| Vanillin                                | 1358 | t         |
| Elemol                                  | 1530 | 4.2       |
| Anydrooplopanone                        | 1576 | t         |
| $\gamma$ -Eudesmol                      | 1609 | 1.6       |
| $\beta$ -Eudesmol                       | 1620 | 1.6       |
| Valerianol                              | 1623 | 0.2       |
| $\alpha$ -Eudesmol                      | 1634 | 2.1       |
| Oplopanoyl acetate*                     | 1808 | t         |
| Phyllocladene                           | 2006 | 4.8       |
| <b>% Identification</b>                 |      | 95.4      |
| <b>Grouped components</b>               |      |           |
| Monoterpene hydrocarbons                |      | 2.3       |
| Oxygen-containing monoterpenes          |      | 78.7      |
| Oxygen-containing sesquiterpenes        |      | 9.6       |
| Diterpene hydrocarbons                  |      | 4.8       |
| Others.                                 |      | t         |

RI: In-lab calculated retention index relative to C<sub>8</sub>-C<sub>21</sub> *n*-alkanes on the DB-1 column. t: traces (< 0.05%). \* Identification based on mass spectra only.

## Sensorial evaluation

### *Sensory Questionnaire (English Version)*

The questionnaire consists of short and objective questions that must be answered based on the samples provided. The data collected is anonymous and is used only for the mentioned purpose.

1. The aroma of many plant species has different volatile chemical compounds with the ability to stimulate our olfactory receptors. The characteristic aromas of plants are related to the quantity and diversity of these compounds in plant species.

2. Essential oils (EOs) are mixtures of volatile compounds isolated from different parts of plants and there is an increasing interest in their use for different purposes, such as in the cosmetics, perfumery, and aromatherapy industries.

---

**Age:**

- 18-30 years old
- 31-40 years old
- 41-50 years old
- 51-60 years old
- More than 60 years old

**Gender:**

- Female
- Male

**Education level:**

- Primary education
- Secondary education
- Higher education

**Region:**

- Country
- City

## Section 1. Emulsion's odour

1. How do you evaluate the odour of the “pink” emulsion?

- Without odour
- Slightly perceptible
- Perceptible
- Very perceptible
- Intense odour

2. In case you identified any odour, how would you classify it?

- Very unpleasant
- Unpleasant
- Pleasant and fresh odour
- Pleasant and hot odour

3. How do you evaluate the odour of the “green” emulsion?

- Without odour
- Slightly perceptible
- Perceptible
- Very perceptible

- Intense odour

4. In case you have identified any odour, how would classify it?

- Very unpleasant
- Unpleasant
- Pleasant and fresh odour
- Pleasant and hot odour

5. How do you evaluate the odour of the “orange” emulsion?

- Without odour
- Slightly perceptible
- Perceptible
- Very perceptible
- Intense odour

6. In case you have identified any odour, how would you classify it?

- Very unpleasant
- Unpleasant
- Pleasant and fresh odour
- Pleasant and hot odour

7. How do you evaluate the odour of the “purple” emulsion?

- Without odour
- Slightly perceptible
- Perceptible
- Very perceptible
- Intense odour

8. In case you identified any odour, how would you classify it?

- Very unpleasant
- Unpleasant
- Pleasant and fresh odour
- Pleasant and hot odour

9. How do you evaluate the odour of the “blue” emulsion?

- Without odour
- Slightly perceptible
- Perceptible
- Very perceptible
- Intense odour

10. In case you have identified any odour, how would you classify it?

- Very unpleasant
- Unpleasant
- Pleasant and fresh odour
- Pleasant and hot odour

11. In your opinion the odours of the different emulsions belong to the same plant species?

- Yes
- No
- Maybe

12. Select which emulsion(s) cause you a feeling of physical and/or mental well-being.

- Pink
- Green
- Orange
- Purple
- Blue
- None

13. Refers what feeling of well-being the emulsions caused you.

- Relaxing
- Decongestant
- Stimulating
- Refreshing
- None

14. Order the samples, according to your preference, on a scale of 1-5 (1-Hateful odour; 2-Unpleasant odour; 3-Pleasant odour; 4-Very pleasant odour and 5-Favourite odour).

|        | 1 | 2 | 3 | 4 | 5 |
|--------|---|---|---|---|---|
| Pink   |   |   |   |   |   |
| Blue   |   |   |   |   |   |
| Purple |   |   |   |   |   |
| Green  |   |   |   |   |   |
| Orange |   |   |   |   |   |

## Section 2. Emulsion's Applicability's

1. Rate each of the products below, on a scale of 1-5: 1. Would never buy, 2. Unlikely, 3. Likely, 4. Quite likely and 5. Would buy, considering the probability of buying one with the "pink" emulsion odour

|               | 1 | 2 | 3 | 4 | 5 |
|---------------|---|---|---|---|---|
| Perfume       |   |   |   |   |   |
| Air freshener |   |   |   |   |   |
| Massage cream |   |   |   |   |   |
| Toothpaste    |   |   |   |   |   |
| Shampoo       |   |   |   |   |   |
| Candy         |   |   |   |   |   |

2. Rate each of the products below, on a scale of 1-5: 1. Would never buy, 2. Unlikely, 3. Likely, 4. Quite likely and 5. Would buy, considering the probability of buying one with the "green" emulsion odour

|               | 1 | 2 | 3 | 4 | 5 |
|---------------|---|---|---|---|---|
| Perfume       |   |   |   |   |   |
| Air freshener |   |   |   |   |   |
| Massage cream |   |   |   |   |   |
| Toothpaste    |   |   |   |   |   |
| Shampoo       |   |   |   |   |   |
| Candy         |   |   |   |   |   |

3. Rate each of the products below, on a scale of 1-5: 1. Would never buy, 2. Unlikely, 3. Likely, 4. Quite likely and 5. Would buy, considering the probability of buying one with the "orange" emulsion odour

|         | 1 | 2 | 3 | 4 | 5 |
|---------|---|---|---|---|---|
| Perfume |   |   |   |   |   |

---

Air freshener  
Massage cream  
Toothpaste  
Shampoo  
Candy

---

4. Rate each of the products below, on a scale of 1-5: 1. Would never buy, 2. Unlikely, 3. Likely, 4. Quite likely and 5. Would buy, considering the probability of buying one with the "purple" emulsion odour

---

|               | 1 | 2 | 3 | 4 | 5 |
|---------------|---|---|---|---|---|
| Perfume       |   |   |   |   |   |
| Air freshener |   |   |   |   |   |
| Massage cream |   |   |   |   |   |
| Toothpaste    |   |   |   |   |   |
| Shampoo       |   |   |   |   |   |
| Candy         |   |   |   |   |   |

---

5. Rate each of the products below, on a scale of 1-5: 1. Would never buy, 2. Unlikely, 3. Likely, 4. Quite likely and 5. Would buy, considering the probability of buying one with the "blue" emulsion odour

---

|               | 1 | 2 | 3 | 4 | 5 |
|---------------|---|---|---|---|---|
| Perfume       |   |   |   |   |   |
| Air freshener |   |   |   |   |   |
| Massage cream |   |   |   |   |   |
| Toothpaste    |   |   |   |   |   |
| Shampoo       |   |   |   |   |   |
| Candy         |   |   |   |   |   |

---

6. Do you consider that the odours in the samples have other applicability? If yes, refer which/which samples and the respective applicability

Answer: \_\_\_\_\_
